# Supplementary material for: Glycine-alanine dipeptide repeats spread rapidly in a repeat length- and age-dependent manner in the fly brain
Source: PubMed Central journal article supplement (PMC6916080; doi:10.1186/s40478-019-0860-x), 2019-12-16

DAPI mCherry

mCherry

elavGS > WT

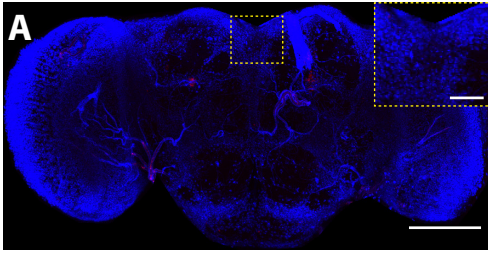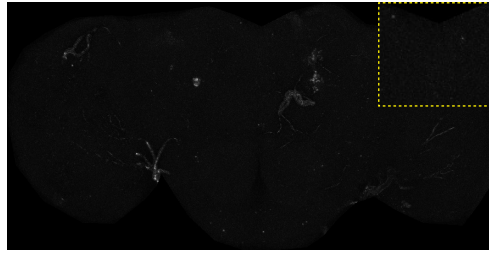

elavGS > GA100mC

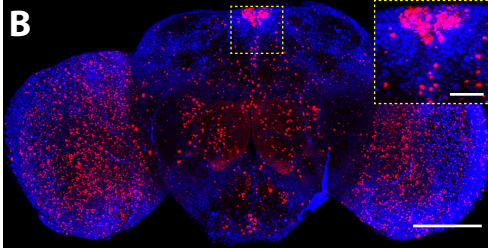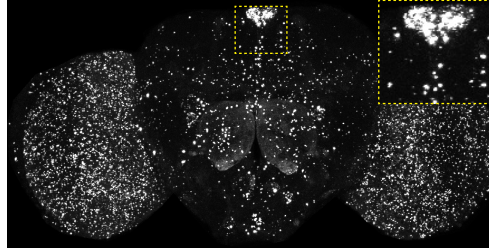

elavGS > PR100mC

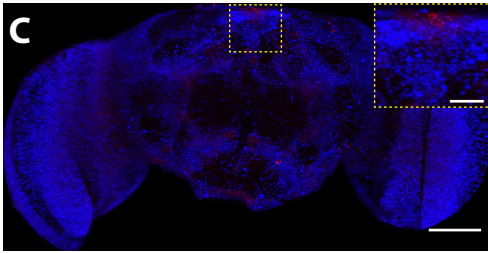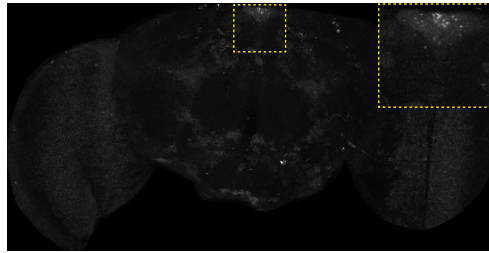

DAPI GR mCherry

GR

mCherry

elavGS > mC

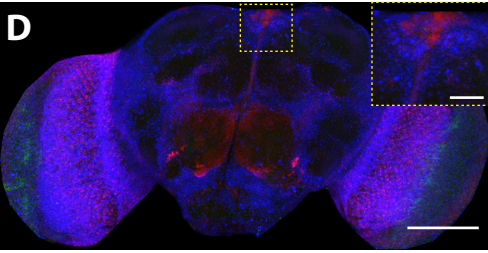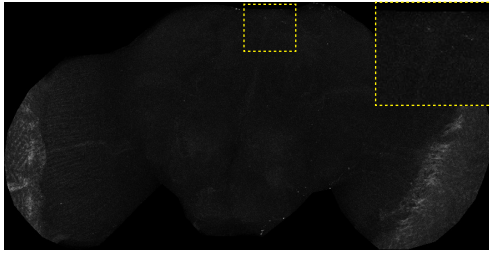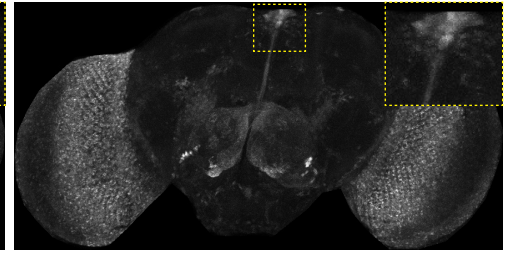

elavGS > GR100mC

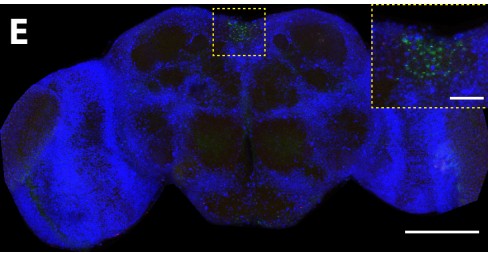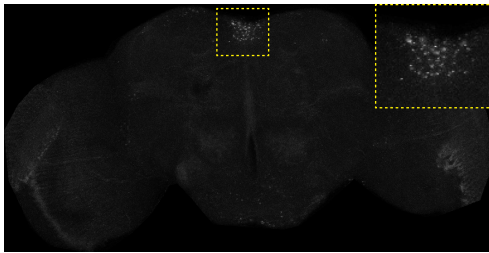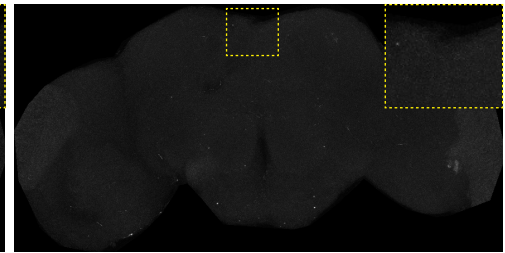

Supplement: 40478_2019_860_MOESM2_ESM.pdf [file 40478_2019_860_MOESM2_ESM.pdf]
